# Supplementary material
Source: MDPI journal article supplement (https://www.mdpi.com/2571-9637/7/2/19)
Supplement: s1 [file s1]

## *Supporting information*

### **Fluorine Free Surface Modification of Microfibrillated Cellulose-Clay Composite Films: Effect of Hydrophobicity on Gas Barrier Performance**

Mohammed Arif Poothanari <sup>1,2,\*</sup> and Yves Leterrier <sup>1</sup>

<sup>1</sup>Laboratory for Processing of Advanced Composites (LPAC), Ecole Polytechnique Fédérale de Lausanne (EPFL), CH-1015 Lausanne, Switzerland

<sup>2</sup>Department of Physics, MES College Nedumkandam, Idukki Township 685553, Kerala, India

\* Correspondence to Mohammed Arif Poothanari, arif@mesnedumkandam.in

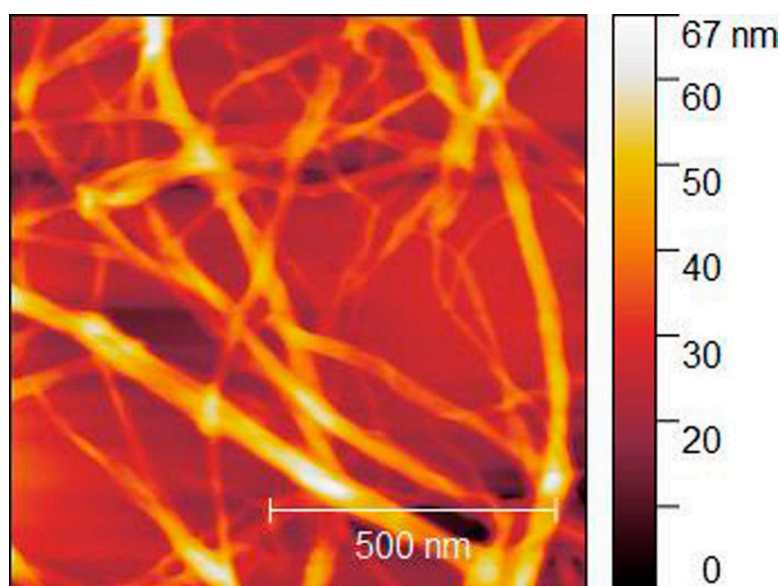

**Figure S1.** AFM image of MFC acquired in tapping mode using a silicon cantilever (AC160TSA) and a Cypher VRS AFM (Oxford Instruments-Asylum Research, USA).

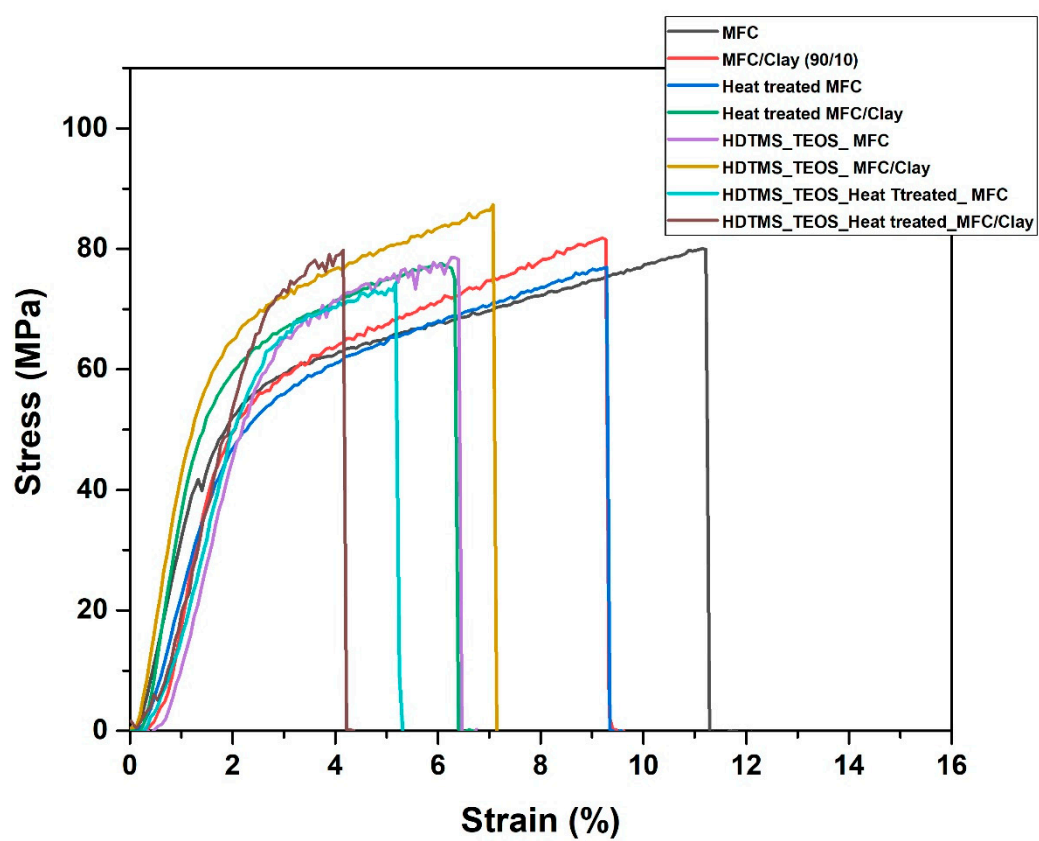

**Figure S2.** Stress-strain curves of MFC films under tensile loading, with and without clay, heat treatment and TEOS-HDTMS modification.
